# Supplementary material for: Electrochemical Performance and Conductivity of N-Doped Carbon Nanotubes Annealed under Various Temperatures as Cathode for Lithium-Ion Batteries
Source: MDPI journal article supplement (doi:10.3390/met12122166), 2022-12-16
Supplement: s1 [file s1]

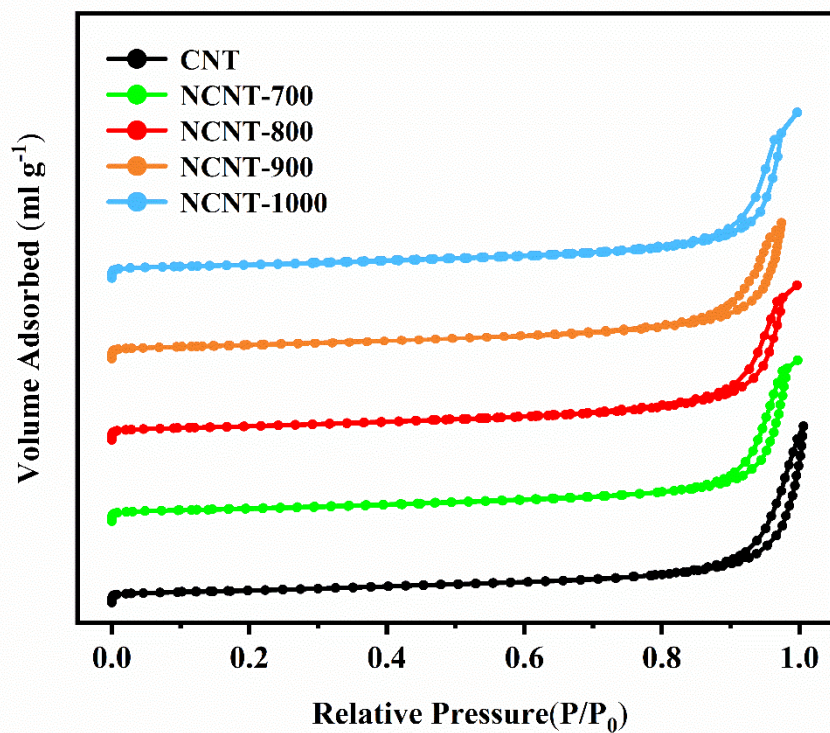

**Figure S1.** N<sub>2</sub> adsorption/desorption isotherms of CNTs and NCNTs samples.

**Table S1.** Specific energy and energy efficiency of each battery at different cycling rates

| Sample     | Cycle Rate (C) | Charge Specific Energy (mWh/g) | Discharge Specific Energy (mWh/g) | Energy Efficient |
|------------|----------------|--------------------------------|-----------------------------------|------------------|
| B-CNT      | 0.1            | 441.212                        | 427.532                           | 96.89%           |
|            | 0.3            | 435.6                          | 422.031                           | 96.88%           |
|            | 0.5            | 433.386                        | 419.43                            | 96.77%           |
|            | 1              | 431.61                         | 411.529                           | 95.34%           |
|            | 3              | 431.663                        | 386.293                           | 89.48%           |
|            | 5              | 417.954                        | 365.161                           | 87.36%           |
|            | 10             | 405.721                        | 311.589                           | 76.79%           |
| B-NCNT-700 | 0.1            | 454.517                        | 444.759                           | 97.85%           |
|            | 0.3            | 451.644                        | 439.358                           | 97.27%           |

|             |     |         |         |        |
|-------------|-----|---------|---------|--------|
|             | 0.5 | 448.182 | 434.919 | 97.04% |
|             | 1   | 446.142 | 424.862 | 95.23% |
|             | 3   | 445.319 | 396.85  | 89.11% |
|             | 5   | 426.005 | 369.532 | 86.74% |
|             | 10  | 410.057 | 316.849 | 77.26% |
| B-NCNT-800  | 0.1 | 451.619 | 441.038 | 97.65% |
|             | 0.3 | 447.658 | 436.527 | 97.51% |
|             | 0.5 | 444.762 | 433.538 | 97.47% |
|             | 1   | 443.794 | 425.65  | 95.91% |
|             | 3   | 443.279 | 401.458 | 90.56% |
|             | 5   | 428.955 | 379.647 | 88.50% |
|             | 10  | 416.953 | 337.312 | 80.89% |
| B-NCNT-900  | 0.1 | 436.605 | 407.036 | 94.22% |
|             | 0.3 | 425.448 | 408.152 | 95.93% |
|             | 0.5 | 421.344 | 405.495 | 96.23% |
|             | 1   | 418.093 | 395.692 | 94.64% |
|             | 3   | 416.668 | 369.342 | 88.64% |
|             | 5   | 401.74  | 347.556 | 86.51% |
|             | 10  | 388.309 | 303.552 | 78.17% |
| B-NCNT-1000 | 0.1 | 419.002 | 407.478 | 97.24% |
|             | 0.3 | 414.426 | 402.636 | 97.15% |
|             | 0.5 | 411.248 | 398.745 | 96.95% |
|             | 1   | 410.139 | 391.025 | 95.33% |
|             | 3   | 408.89  | 365.004 | 89.26% |
|             | 5   | 393.751 | 344.452 | 87.47% |
|             | 10  | 380.981 | 300.317 | 78.82% |

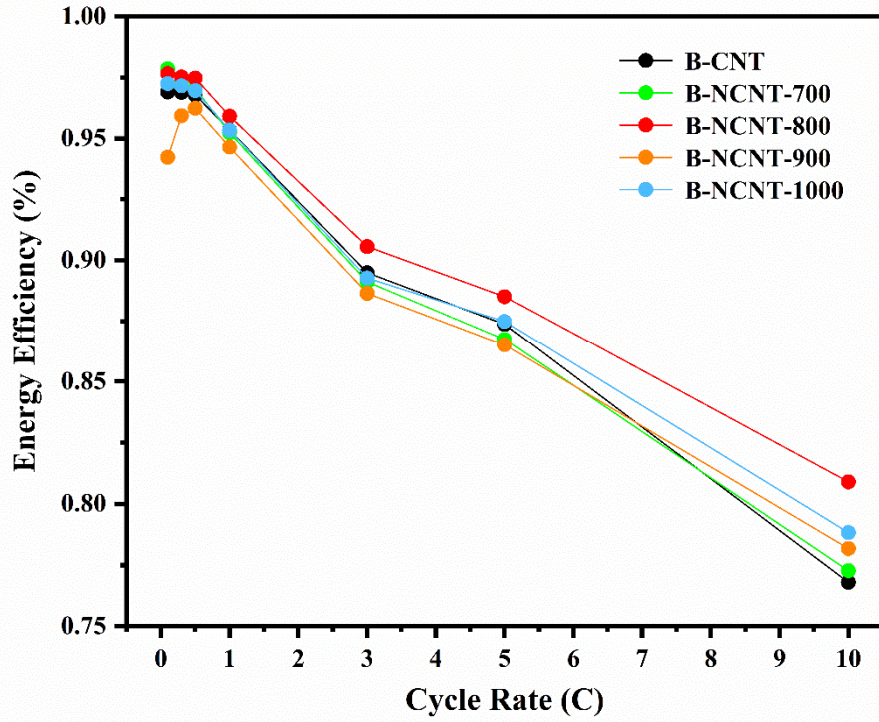

**Figure S2.** Energy efficiency of batteries at different cycling rates

Figs. S3 shows the CV measurement of the (c) B-NCNT-800 and (d) B-CNT at diverse scanning rates ranging from 0.1-1mV s<sup>-1</sup>. The Randles-Sevcik formula was used to evaluate the lithium-ion diffusion coefficient. Accordingly, the formula can be written as follows.

$$I_p = 2.69 \times 10^5 A n^{\frac{3}{2}} C D^{\frac{1}{2}} v^{\frac{1}{2}} \quad (1)$$

where  $I_p$  is the peak current,  $A$  is the surface area of the electrode,  $D$  is the diffusion coefficient of lithium ions,  $C$  is the concentration of lithium ions involved in the redox reaction,  $v$  is CV scanning rate, and  $n$  is the number of electron transfer in electrode reaction. Considering that only different conductive additives are used as variables between B-NCNT-800 and B-CNT, the  $A$ ,  $C$ ,  $v$  parameters can be considered constant values. Fig. S3(e) shows the plotted linear regression of the peak current ( $I_p$ ) versus the square root of the scan rate. It shows that the linear regression slope of B-NCNT-800 is nearly the same as that of B-CNT, which indicates that the use of nitrogen-doped carbon nanotubes could not affect the diffusion coefficient of lithium ions in the electrode.

The effect of pseudocapacitance can be determined by using the following formula to investigate the charge-transfer process at the surface.

$$I_p = a v^b \quad (2)$$

Where both  $a$  and  $b$  are adjustable parameters. The value of  $b$  can be determined by the slope of  $\log I_p$  Vs.  $\log v$ . Fig. S3(f) shows the linear regression of  $\log I_p$  and  $\log v$ . While the  $b$ -values of both cells are in the range of 0.8 to 1.0, indicating that the current is predominantly capacitive.

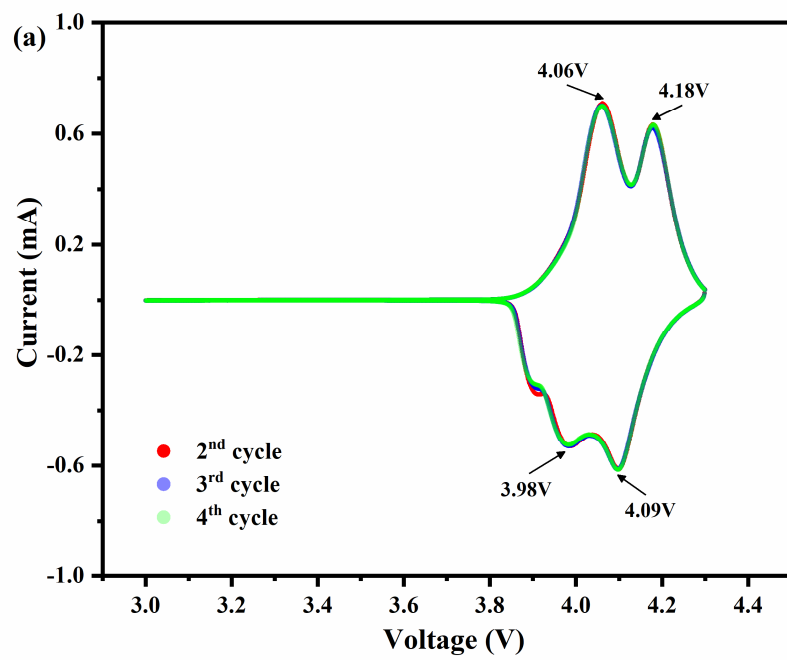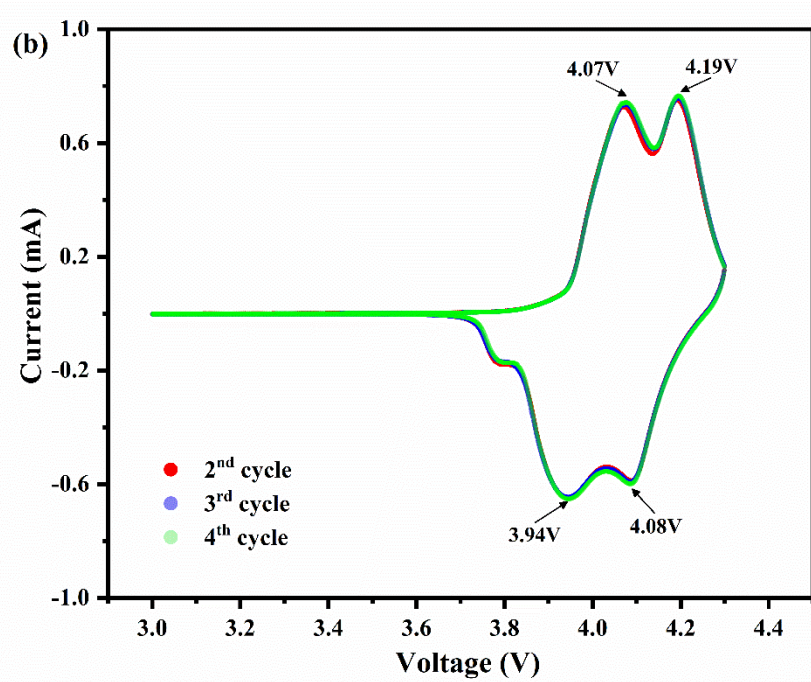

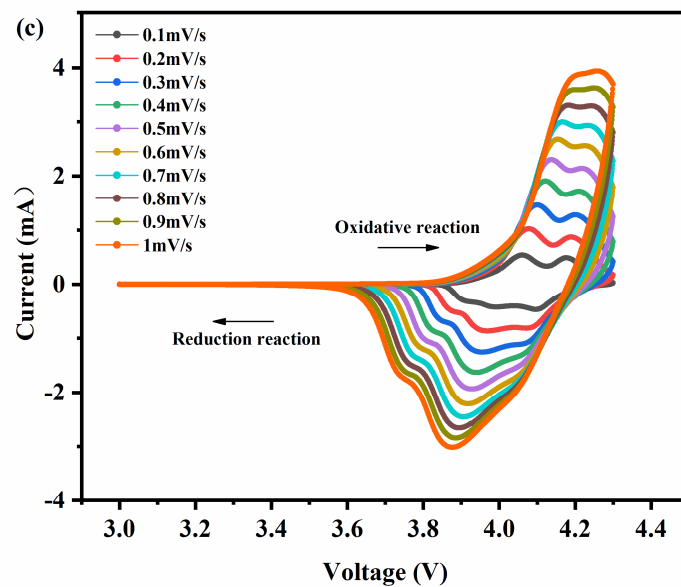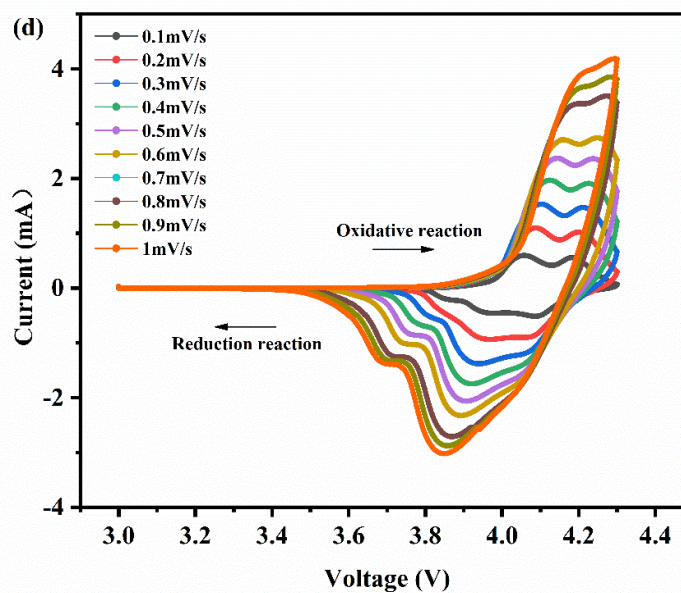



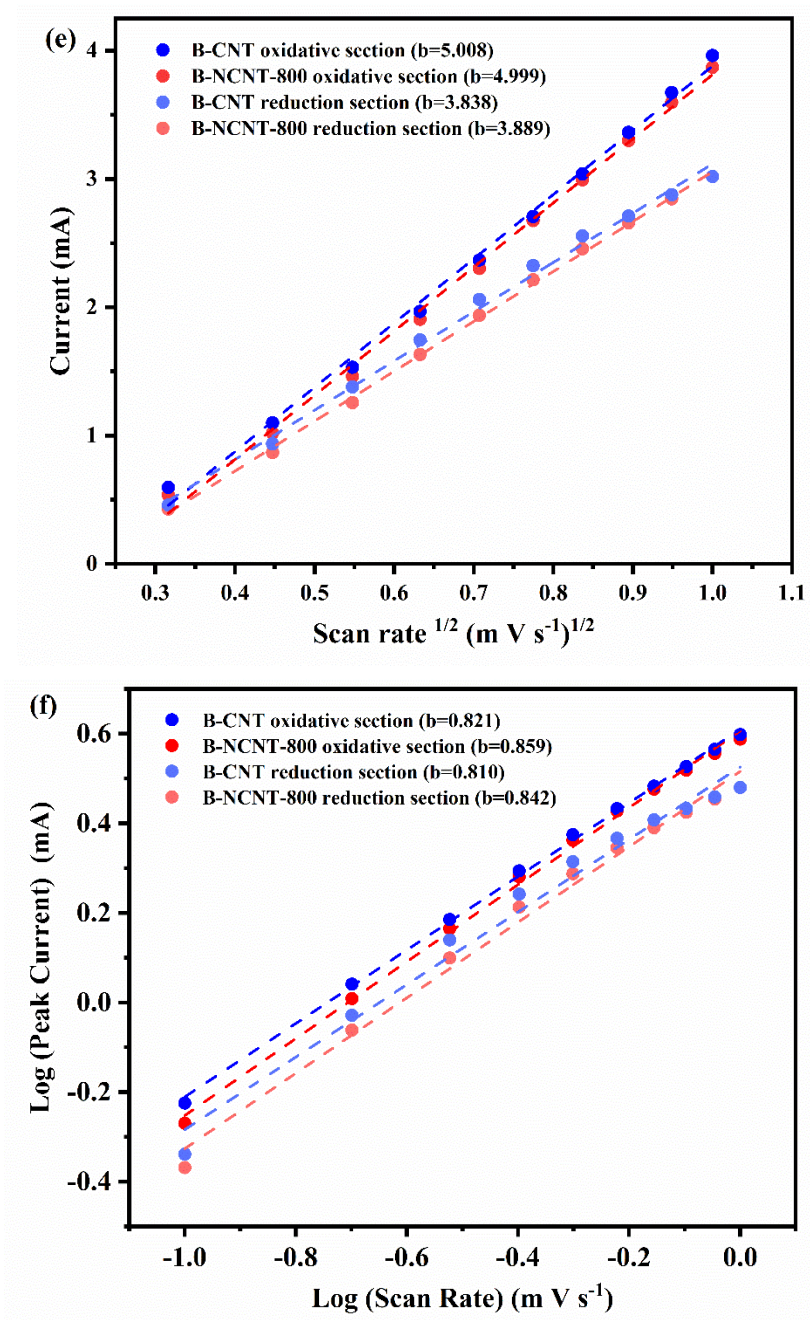

**Figure S3.** a-f): CV curves of the B-NCNT-800 (a) and B-CNT (b) cells for second to third cycles at a scan rate of  $0.1 \text{ mV s}^{-1}$  over the potential range of 3.0–4.3 V, the CV curves at diverse scanning rates of the B-NCNT-800 (c) and B-CNT(d), use of eq 1 to analyze the CV data for the B-NCNT-800 and B-CNT(e), and the use of eq 2 to analyze the CV data for the B-NCNT-800 and B-CNT(f).
